# Supplementary material
Source: publisher site journal article supplement (https://www.dovepress.com/article/235777)
Supplement: Supplementary file 1 [file 09_Jan_2020_04_Jan_2020_Appendix_1_-_Scenario_12282019.pdf › 09_Jan_2020_04_Jan_2020_Appendix_1_-_Scenario_12282019.pdf]

## SCENARIO

### SECTION A:

*Please read the following statement to the participant and check off the appropriate response:*

In the following scenario, you will be asked to provide your opinion. The scenario does not reflect your current medical situation, and is a hypothetical one we are using for study participants with different cancers.

In this hypothetical scenario, you have been diagnosed with a completely new cancer, and unfortunately, this new cancer (unrelated to your current cancer) has spread to the point where it cannot be removed by an operation.

Multiple medications have been developed that could help control your cancer. They all have the same risk of complications, and if administered to the right patient, have the same effect on the cancer, limiting its progression for up to 6 months. However, we must perform a test to determine which medication is right for your hypothetical cancer.

**\* If patient asks for additional information about medications, see stats below.**

You are given a choice:

In the **first choice**, you can receive a needle biopsy of an internal organ, such as the lung or liver, where a needle is inserted through the skin after a local anesthetic is used to numb the area, and a small piece of the internal organ tissue affected by cancer is removed by the needle and sent for testing. This test is associated with a 5% chance of a major complication causing you to have to stay in the hospital for a few days. Potential side effects include bleeding and infection. Temporary pain lasting a day or two is common.

In the **second choice**, you can receive a newly developed blood test where three small tubes of blood are taken once. The side effects of a blood draw are rare and minor, such as fainting, bruising or rarely, bleeding.

Regardless of your choice, you will wait an average of two weeks for results of these specialized tests to return. There is an 80% chance that the first test we do tells us which medication will have the greatest effect on you. If the test is inconclusive, a second test, a needle biopsy, will be performed to determine whether you qualify for the medication.

Which choice would you prefer for providing your first sample?

**Choice 1 (Needle biopsy)** ☐ **Choice 2 (Blood sample)** ☐

\*

- Each of the medications has a 5% chance of causing a dangerous side effect leading to hospitalization
- The average medication will control the cancer in a third to half of the patients it is used on
- Choosing the right medication will improve your chances of controlling the cancer by 15-20%. In other words, the average person getting the best medication will have the disease controlled by an additional 4-6 months.

## **SECTION B:**

Now imagine that you are given the same scenario, but the wait time for the results of the first test is different between the two options.

### **If the patient chose a biopsy:**

The wait time for the result of a blood test hasn't changed (average of 2 weeks wait), however the needle biopsy result has increased to:

### **If the patient chose a blood test:**

The wait time for the result of the needle biopsy hasn't changed (average of 2 weeks), however the blood test result has increased to:

### **WOULD YOU STILL CHOOSE YOUR ORIGINAL OPTION?**

---

|          |                              |                             |          |                              |                             |
|----------|------------------------------|-----------------------------|----------|------------------------------|-----------------------------|
| 4 weeks  | Yes <input type="checkbox"/> | No <input type="checkbox"/> | 3 weeks  | Yes <input type="checkbox"/> | No <input type="checkbox"/> |
| 6 weeks  | Yes <input type="checkbox"/> | No <input type="checkbox"/> | 5 weeks  | Yes <input type="checkbox"/> | No <input type="checkbox"/> |
| 8 weeks  | Yes <input type="checkbox"/> | No <input type="checkbox"/> | 7 weeks  | Yes <input type="checkbox"/> | No <input type="checkbox"/> |
| 10 weeks | Yes <input type="checkbox"/> | No <input type="checkbox"/> | 9 weeks  | Yes <input type="checkbox"/> | No <input type="checkbox"/> |
| 12 weeks | Yes <input type="checkbox"/> | No <input type="checkbox"/> | 11 weeks | Yes <input type="checkbox"/> | No <input type="checkbox"/> |
| 14 weeks | Yes <input type="checkbox"/> | No <input type="checkbox"/> | 13 weeks | Yes <input type="checkbox"/> | No <input type="checkbox"/> |
| 16 weeks | Yes <input type="checkbox"/> | No <input type="checkbox"/> | 15 weeks | Yes <input type="checkbox"/> | No <input type="checkbox"/> |

Proceed down left column. Once given answer is "No," present an option that is one week less, and record response.

2 weeks (Will Change if the waiting period changes) ☐  
Will always choose the original option (Yes to all) ☐

### SECTION C:

Now let's say that we return to the original scenario where the wait time for the biopsy and the blood test are the same. However, the chance that the sample taken will be adequate to determine which medication is best for your cancer is different between the two options.

#### **If the patient chose a biopsy:**

The chance that the needle biopsy test will be adequate to determine the best medication for your cancer has dropped from 80% to (see below):

Note that the chance that the blood sample will be adequate to determine the best medication for your cancer remains the same (80%).

#### **If the patient chose a blood test:**

The chance that the blood sample will be adequate to determine the best medication for your cancer has dropped from 80% to (see below):

Note that the chance that the needle biopsy will be adequate to determine the best medication for your cancer remains the same (80%).

#### **WOULD YOU STILL CHOOSE YOUR ORIGINAL OPTION?**

---

|     |                              |                             |
|-----|------------------------------|-----------------------------|
| 70% | Yes <input type="checkbox"/> | No <input type="checkbox"/> |
| 60% | Yes <input type="checkbox"/> | No <input type="checkbox"/> |
| 50% | Yes <input type="checkbox"/> | No <input type="checkbox"/> |
| 40% | Yes <input type="checkbox"/> | No <input type="checkbox"/> |
| 30% | Yes <input type="checkbox"/> | No <input type="checkbox"/> |
| 20% | Yes <input type="checkbox"/> | No <input type="checkbox"/> |
| 10% | Yes <input type="checkbox"/> | No <input type="checkbox"/> |

|     |                              |                             |
|-----|------------------------------|-----------------------------|
| 75% | Yes <input type="checkbox"/> | No <input type="checkbox"/> |
| 65% | Yes <input type="checkbox"/> | No <input type="checkbox"/> |
| 55% | Yes <input type="checkbox"/> | No <input type="checkbox"/> |
| 45% | Yes <input type="checkbox"/> | No <input type="checkbox"/> |
| 35% | Yes <input type="checkbox"/> | No <input type="checkbox"/> |
| 25% | Yes <input type="checkbox"/> | No <input type="checkbox"/> |
| 15% | Yes <input type="checkbox"/> | No <input type="checkbox"/> |

Proceed down left column. Once answer given is "No", present the option that is 5% higher, and record response.

|                                                     |                          |
|-----------------------------------------------------|--------------------------|
| 80% (Will Change if the accuracy changes)           | <input type="checkbox"/> |
| Will always choose the original option (Yes to all) | <input type="checkbox"/> |

### SECTION D:

Now let's say the wait times for the test results are back to 2 weeks for both choices, and the chance that your preferred test option will produce results to determine your medication is \_\_\_\_\_, (*Use the lowest percentage the patient said "Yes" to in section C*) as you just mentioned. However, now the risk of side effects from the needle biopsy of the internal organ itself is different.

Whereas the old chance of a major complication for the biopsy leading to hospitalization was 5%, the new chance of a major complication of this biopsy is now:

#### WOULD YOU STILL CHOOSE YOUR ORIGINAL OPTION?

---

##### If needle biopsy was chosen:

|     |                              |                             |
|-----|------------------------------|-----------------------------|
| 5%  | Yes <input type="checkbox"/> | No <input type="checkbox"/> |
| 6%  | Yes <input type="checkbox"/> | No <input type="checkbox"/> |
| 7%  | Yes <input type="checkbox"/> | No <input type="checkbox"/> |
| 8%  | Yes <input type="checkbox"/> | No <input type="checkbox"/> |
| 9%  | Yes <input type="checkbox"/> | No <input type="checkbox"/> |
| 10% | Yes <input type="checkbox"/> | No <input type="checkbox"/> |
| 11% | Yes <input type="checkbox"/> | No <input type="checkbox"/> |
| 12% | Yes <input type="checkbox"/> | No <input type="checkbox"/> |
| 13% | Yes <input type="checkbox"/> | No <input type="checkbox"/> |
| 14% | Yes <input type="checkbox"/> | No <input type="checkbox"/> |
| 15% | Yes <input type="checkbox"/> | No <input type="checkbox"/> |
| 17% | Yes <input type="checkbox"/> | No <input type="checkbox"/> |
| 20% | Yes <input type="checkbox"/> | No <input type="checkbox"/> |
| 22% | Yes <input type="checkbox"/> | No <input type="checkbox"/> |
| 25% | Yes <input type="checkbox"/> | No <input type="checkbox"/> |
| 35% | Yes <input type="checkbox"/> | No <input type="checkbox"/> |
| 50% | Yes <input type="checkbox"/> | No <input type="checkbox"/> |
| 75% | Yes <input type="checkbox"/> | No <input type="checkbox"/> |

##### If blood test was chosen:

|        |                              |                                |
|--------|------------------------------|--------------------------------|
| 5%     | Yes <input type="checkbox"/> | No <input type="checkbox"/>    |
| 4%     | Yes <input type="checkbox"/> | No <input type="checkbox"/>    |
| 3%     | Yes <input type="checkbox"/> | No <input type="checkbox"/>    |
| 2%     | Yes <input type="checkbox"/> | No <input type="checkbox"/>    |
| 1.5%   | Yes <input type="checkbox"/> | No <input type="checkbox"/>    |
| 1%     | Yes <input type="checkbox"/> | No <input type="checkbox"/>    |
| 0.5%   | Yes <input type="checkbox"/> | No <input type="checkbox"/>    |
| 0.1%   | Yes <input type="checkbox"/> | No <input type="checkbox"/>    |
| 0.01%  | Yes <input type="checkbox"/> | No <input type="checkbox"/>    |
| 0.001% | Yes <input type="checkbox"/> | No <input type="checkbox"/>    |
| 0%     | Yes <input type="checkbox"/> | No <input type="checkbox"/>    |
|        |                              | Never <input type="checkbox"/> |

Proceed down side according to original test option, and stop when "No" is chosen.
